# Supplementary material for: [C5H12N]2SnBr6: a lead-free phase transition compound with switchable quadratic nonlinear optical properties
Source: Royal Society of Chemistry journal article supplement (doi:10.1039/d2qm01340a), 2023-01-01
Supplement: d2qm01340a1.pdf [file d2qm01340a1.pdf]

## Supporting Information

### $[\text{C}_5\text{H}_{12}\text{N}]_2\text{SnBr}_6$ : A Lead-Free Phase Transition Compound with Switchable Quadratic Nonlinear Optical Properties

Xinxin Hu,<sup>ab</sup> Haojie Xu,<sup>ab</sup> Wuqian Guo,<sup>ab</sup> Shiguo Han,<sup>a</sup> Yi Liu,<sup>a</sup> Yu Ma,<sup>ab</sup> Qingshun Fan,<sup>ab</sup> Junhua Luo<sup>a</sup> and Zhihua Sun<sup>\*ac</sup>

<sup>a</sup> State Key Laboratory of Structural Chemistry, Fujian Institute of Research on the Structure of Matter, Chinese Academy of Sciences, Fuzhou, Fujian 350002, China

<sup>b</sup> University of Chinese Academy of Sciences, Beijing 100049, China

<sup>c</sup> Fujian Science & Technology Innovation Laboratory for Optoelectronic Information of China, Fuzhou, Fujian 350108, P. R. China.

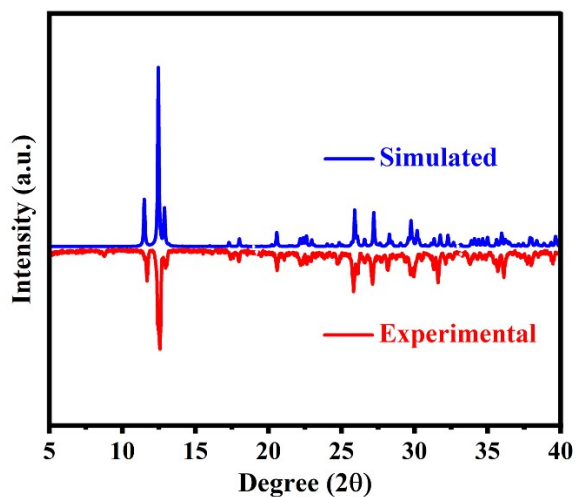

**Figure S1.** Experimental and simulated PXRD patterns for **1** at room temperature.

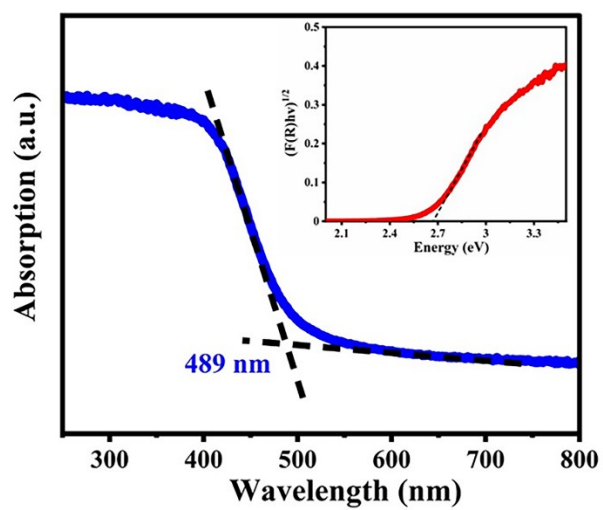

**Figure S2.** UV-vis absorption spectra of **1**. Inset: the optical properties estimated by *Tauc* Plot.

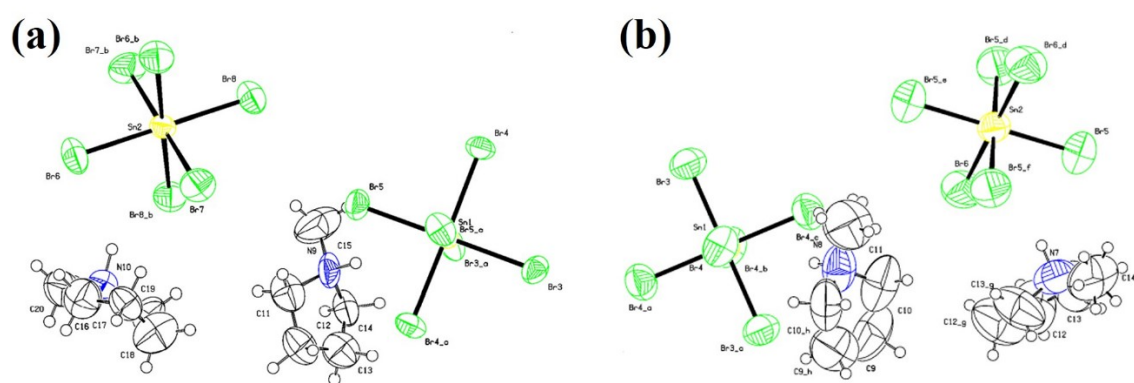

**Figure S3.** (a) The thermal ellipsoid variation of **1** at 300 K and (b) 360 K, respectively.

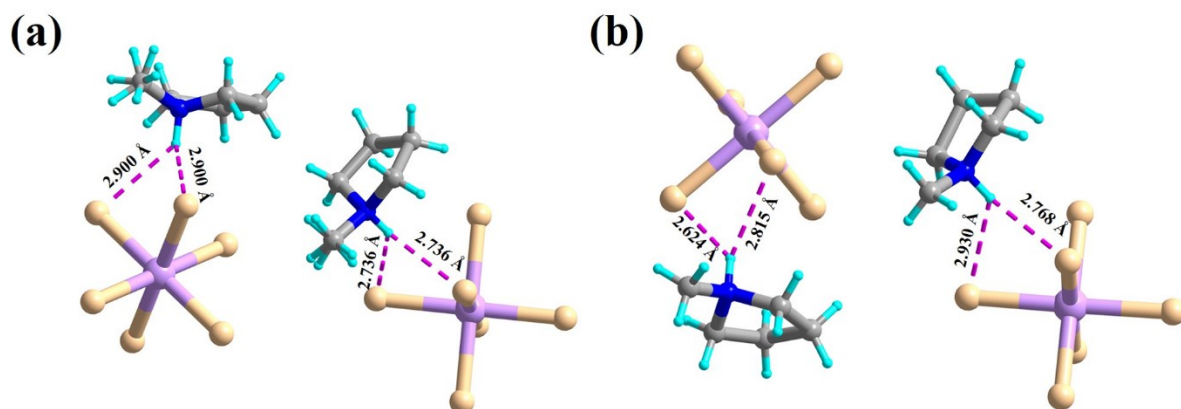

**Figure S4.** (a) The N-H...Br hydrogen bonds between N and Br atoms at 360 K and (b) 300 K.

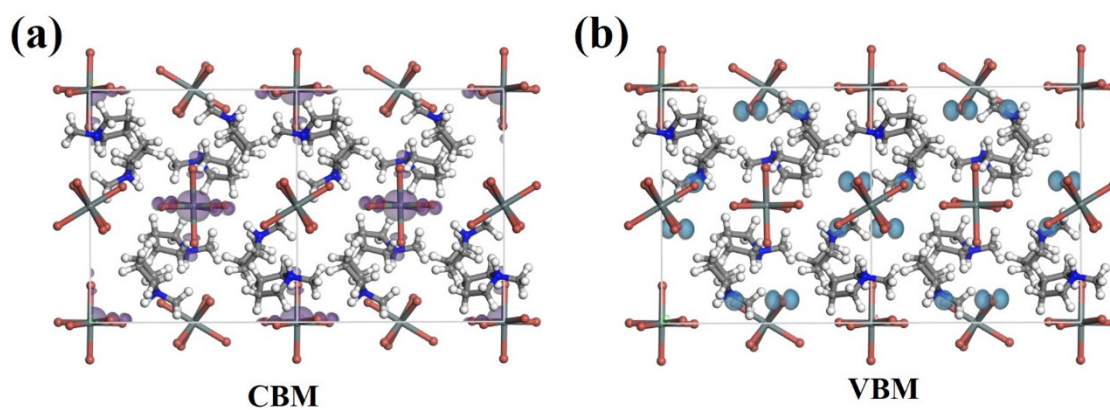

**Figure S5.** (a) Calculated charge-density distribution of the CBM and (b) VBM of **1**.

**Table S1.** Crystal data and structure refinement of **1**

|                                                     |                                                                             |                                                                            |
|-----------------------------------------------------|-----------------------------------------------------------------------------|----------------------------------------------------------------------------|
| Empirical formula                                   | C <sub>10</sub> H <sub>24</sub> Br <sub>6</sub> N <sub>2</sub> Sn           | C <sub>10</sub> H <sub>24</sub> Br <sub>6</sub> N <sub>2</sub> Sn          |
| Temperature (K)                                     | 360                                                                         | 300                                                                        |
| Formula weight                                      | 770.46                                                                      | 770.46                                                                     |
| Crystal system                                      | Orthorhombic                                                                | Orthorhombic                                                               |
| Space group                                         | <i>Pbam</i>                                                                 | <i>Pba2</i>                                                                |
| Unit cell dimensions (Å)                            | <i>a</i> = 13.9302 (10)<br><i>b</i> = 15.5956 (9)<br><i>c</i> = 10.1118 (8) | <i>a</i> = 15.5317 (4)<br><i>b</i> = 13.8474 (3)<br><i>c</i> = 10.0184 (3) |
| Volume (Å <sup>3</sup> )                            | 2196.8 (3)                                                                  | 2157.39 (10)                                                               |
| Z, Calculated density (g/cm <sup>3</sup> )          | 4, 2.330                                                                    | 4, 2.372                                                                   |
| F (000)                                             | 1432.0                                                                      | 1432.0                                                                     |
| Radiation                                           | Mo Kα (λ = 0.71073)                                                         | Ga Kα (λ = 1.3405)                                                         |
| 2 θ range for data collection/°                     | 6.406 to 54.978                                                             | 7.43 to 120.258                                                            |
| Limiting indices                                    | -18 ≤ <i>h</i> ≤ 18<br>-18 ≤ <i>k</i> ≤ 20<br>-13 ≤ <i>l</i> ≤ 13           | -20 ≤ <i>h</i> ≤ 20<br>-7 ≤ <i>k</i> ≤ 17<br>-12 ≤ <i>l</i> ≤ 12           |
| Reflections collected                               | 40197                                                                       | 15344                                                                      |
| Completeness                                        | 99.7 %                                                                      | 99.9 %                                                                     |
| Data/ restraints/ parameters                        | 2661/1/99                                                                   | 4550/3/176                                                                 |
| Goodness-of-fit on <i>F</i> <sup>2</sup>            | 1.014                                                                       | 1.060                                                                      |
| Final <i>R</i> indexes [ <i>I</i> > 2σ( <i>I</i> )] | <i>R</i> <sub>1</sub> = 0.0449, <i>wR</i> <sub>2</sub> = 0.1031             | <i>R</i> <sub>1</sub> = 0.0515, <i>wR</i> <sub>2</sub> = 0.1474            |
| Final <i>R</i> indexes [all data]                   | <i>R</i> <sub>1</sub> = 0.0648, <i>wR</i> <sub>2</sub> = 0.1455             | <i>R</i> <sub>1</sub> = 0.0618, <i>wR</i> <sub>2</sub> = 0.1557            |

**Table S2.** Bond Lengths [Å] for **1** at 360 K

| Atom-Atom            | Length/ Å   | Atom-Atom            | Length/ Å   |
|----------------------|-------------|----------------------|-------------|
| Sn1-Br3              | 2.5936 (11) | Sn2-Br6              | 2.5886 (14) |
| Sn1-Br3 <sup>1</sup> | 2.5936 (11) | N7-C14               | 1.537 (18)  |
| Sn1-Br4 <sup>2</sup> | 2.5977 (9)  | N7-C13 <sup>5</sup>  | 1.398 (13)  |
| Sn1-Br4 <sup>1</sup> | 2.5977 (9)  | N7-C13               | 1.398 (13)  |
| Sn1-Br4 <sup>3</sup> | 2.5976 (9)  | N8-C10               | 1.412 (112) |
| Sn1-Br4              | 2.5976 (9)  | N8-C10 <sup>2</sup>  | 1.412 (12)  |
| Sn2-Br5              | 2.6019 (10) | C8-C11               | 1.47 (2)    |
| Sn2-Br5 <sup>4</sup> | 2.6020 (10) | C10-C9               | 1.493 (17)  |
| Sn2-Br5 <sup>5</sup> | 2.6020 (10) | C9-C9 <sup>2</sup>   | 1.55 (3)    |
| Sn2-Br5 <sup>6</sup> | 2.6020 (10) | C12-C12 <sup>5</sup> | 1.435 (17)  |
| Sn2-Br6 <sup>4</sup> | 2.599 (14)  | C12-C13              | 1.568 (14)  |

Symmetry transformation used to generate equivalent atoms:

<sup>1</sup>-X,1-Y,2-Z; <sup>2</sup>+X,+Y,2-Z; <sup>3</sup>-X,1-Y,+Z; <sup>4</sup>1-X,1-Y,1-Z; <sup>5</sup>+X,+Y,1-Z; <sup>6</sup>1-X,1-Y,+Z

**Table S3.** Bond Lengths [Å] for **1** at 300 K

| Atom-Atom            | Length/ Å  | Atom-Atom | Length/ Å  |
|----------------------|------------|-----------|------------|
| Sn1-Br3              | 2.593 (3)  | N9-C14    | 1.45 (3)   |
| Sn1-Br3 <sup>1</sup> | 2.593 (3)  | N9-C15    | 1.46 (2)   |
| Sn1-Br4              | 2.5929 (9) | N9-C11    | 1.45 (3)   |
| Sn1-Br4 <sup>1</sup> | 2.5928 (9) | N10-C16   | 1.42 (3)   |
| Sn1-Br5 <sup>1</sup> | 2.594 (3)  | N10-C20   | 1.506 (16) |
| Sn1-Br5              | 2.594 (3)  | N10-C19   | 1.46 (3)   |
| Sn2-Br8 <sup>2</sup> | 2.607 (4)  | C14-C13   | 1.46 (2)   |
| Sn2-Br8              | 2.607 (4)  | C16-C17   | 1.46 (3)   |
| Sn2-Br7              | 2.5827 (9) | C18-C19   | 1.64 (5)   |
| Sn2-Br7 <sup>2</sup> | 2.5827 (9) | C18-C17   | 1.43 (3)   |
| Sn2-Br6 <sup>2</sup> | 2.599 (4)  | C11-C12   | 1.52 (2)   |
| Sn2-Br6              | 2.599 (4)  | C12-C13   | 1.56 (4)   |

Symmetry transformation used to generate equivalent atoms: <sup>1</sup>1-X,1-Y,+Z; <sup>2</sup>1-X,-Y,+Z

**Table S4.** Bond angles for **1** at 360 K

| Atom-Atom-Atom                         | Angle/ °   | Atom-Atom-Atom                         | Angle/ °   |
|----------------------------------------|------------|----------------------------------------|------------|
| Br3-Sn1-Br3 <sup>1</sup>               | 180.0      | Br5 <sup>5</sup> -Sn2-Br5 <sup>6</sup> | 180.00 (4) |
| Br3 <sup>1</sup> -Sn1-Br4 <sup>2</sup> | 88.83 (3)  | Br5 <sup>4</sup> -Sn2-Br5              | 89.73 (4)  |
| Br3-Sn1-Br4 <sup>1</sup>               | 88.83 (3)  | Br6-Sn2-Br5 <sup>5</sup>               | 89.73 (4)  |
| Br3 <sup>1</sup> -Sn1-Br4 <sup>1</sup> | 91.17 (3)  | Br6 <sup>4</sup> -Sn2-Br5 <sup>6</sup> | 89.73 (4)  |
| Br3 <sup>1</sup> -Sn1-Br4              | 88.83 (3)  | Br6-Sn2-Br5                            | 90.27 (4)  |
| Br3-Sn1-Br4 <sup>3</sup>               | 88.83 (3)  | Br6-Sn2-Br5 <sup>6</sup>               | 90.27 (4)  |
| Br3-Sn1-Br4 <sup>2</sup>               | 91.17 (3)  | Br6 <sup>4</sup> -Sn2-Br5 <sup>5</sup> | 90.27 (4)  |
| Br3-Sn1-Br4                            | 91.17 (3)  | Br6 <sup>4</sup> -Sn2-Br5 <sup>4</sup> | 90.27 (4)  |
| Br3 <sup>1</sup> -Sn1-Br4 <sup>3</sup> | 91.17 (3)  | Br6-Sn2-Br5 <sup>4</sup>               | 89.73 (4)  |
| Br4-Sn1-Br4 <sup>2</sup>               | 89.06 (5)  | Br6-Sn2-Br6 <sup>4</sup>               | 180.0      |
| Br4 <sup>1</sup> -Sn1-Br4 <sup>3</sup> | 89.06 (5)  | C13-N7-C14                             | 110.6 (10) |
| Br4-Sn1-Br4 <sup>1</sup>               | 180.00 (4) | C13 <sup>6</sup> -N7-C14               | 110.6 (10) |
| Br4-Sn1-Br4 <sup>3</sup>               | 90.94 (5)  | C13-N7-C13 <sup>6</sup>                | 111.6 (16) |
| Br4 <sup>2</sup> -Sn1-Br4 <sup>3</sup> | 180.0      | C10 <sup>2</sup> -N8-C10               | 105.8 (14) |
| Br4 <sup>1</sup> -Sn1-Br4 <sup>2</sup> | 90.94 (5)  | C10 <sup>2</sup> -N8-C11               | 110.1 (10) |
| Br5-Sn2-Br5 <sup>4</sup>               | 180.0      | C10-N8-C11                             | 110.1 (10) |
| Br5-Sn2-Br5 <sup>5</sup>               | 90.32 (5)  | N8-C10-C9                              | 104.3 (13) |
| Br5 <sup>4</sup> -Sn2-Br5 <sup>5</sup> | 89.68 (5)  | C10-C9-C9 <sup>2</sup>                 | 103.7 (8)  |
| Br5 <sup>4</sup> -Sn2-Br5 <sup>6</sup> | 90.32 (5)  | C12 <sup>6</sup> -C12-C13              | 106.2 (6)  |
| Br5-Sn2-Br5 <sup>6</sup>               | 89.68 (5)  | N7-C13-C12                             | 103.5 (11) |

Symmetry transformation used to generate equivalent atoms:

<sup>1</sup>-X,1-Y,2-Z; <sup>2</sup>+X,+Y,2-Z; <sup>3</sup>-X,1-Y,+Z; <sup>4</sup>1-X,1-Y,1-Z; <sup>5</sup>+X,+Y,1-Z; <sup>6</sup>1-X,1-Y,+Z

**Table S5.** Bond angles for **1** at 300 K

| Atom-Atom-Atom                         | Angle/ °    | Atom-Atom-Atom                         | Angle/ °    |
|----------------------------------------|-------------|----------------------------------------|-------------|
| Br3 <sup>1</sup> -Sn1-Br3              | 91.40 (16)  | Br7-Sn2-Br6 <sup>2</sup>               | 89.47 (14)  |
| Br3 <sup>1</sup> -Sn1-Br5 <sup>1</sup> | 179.36 (15) | Br7-Sn2-Br6                            | 90.51 (14)  |
| Br3-Sn1-Br5 <sup>1</sup>               | 89.21 (4)   | Br7 <sup>2</sup> -Sn2-Br6              | 89.47 (14)  |
| Br3 <sup>1</sup> -Sn1-Br5              | 89.21 (4)   | Br6-Sn2-Br8 <sup>2</sup>               | 89.69 (4)   |
| Br3-Sn1-Br5                            | 179.36 (15) | Br6 <sup>2</sup> -Sn2-Br8              | 89.69 (4)   |
| Br4 <sup>1</sup> -Sn1-Br3              | 91.13 (9)   | Br6 <sup>2</sup> -Sn2-Br8 <sup>2</sup> | 179.17 (14) |
| Br4-Sn1-Br3 <sup>1</sup>               | 91.13 (9)   | Br6-Sn2-Br8                            | 179.17 (14) |
| Br4-Sn1-Br3                            | 88.85 (9)   | Br6-Sn2-Br6 <sup>2</sup>               | 89.98 (19)  |
| Br4 <sup>1</sup> -Sn1-Br3 <sup>1</sup> | 88.85 (9)   | C14 N9 C15                             | 114 (2)     |
| Br4 <sup>1</sup> -Sn1-Br4              | 180.0 (2)   | C11 N9 C14                             | 104.9 (11)  |
| Br4-Sn1-Br5                            | 91.33 (9)   | C11 N9 C15                             | 114 (3)     |
| Br4 <sup>1</sup> -Sn1-Br5 <sup>1</sup> | 91.33 (9)   | C16 N10 C20                            | 111 (2)     |
| Br4 <sup>1</sup> -Sn1-Br5              | 88.69 (9)   | C9 N10 C20                             | 107.0 (13)  |
| Br5-Sn1-Br5 <sup>1</sup>               | 88.69 (9)   | C16 N10 C20                            | 115 (3)     |
| Br4 <sup>1</sup> -Sn1-Br4 <sup>2</sup> | 90.19 (16)  | N9 C14 C13                             | 102.1 (19)  |
| Br8-Sn2-Br8 <sup>2</sup>               | 90.64 (18)  | N10 C16 C17                            | 104 (2)     |
| Br7 <sup>2</sup> -Sn2-Br8 <sup>2</sup> | 90.26 (13)  | C17 C18 C19                            | 101 (2)     |
| Br7-Sn2-Br8                            | 90.26 (13)  | N9 C11 C12                             | 109 (2)     |
| Br7 <sup>2</sup> -Sn2-Br8              | 89.77 (14)  | N10 C19 C18                            | 104 (2)     |
| Br7-Sn2-Br8 <sup>2</sup>               | 89.77 (14)  | C18 C17 C16                            | 106 (3)     |
| Br7-Sn2-Br7 <sup>2</sup>               | 180.0 (3)   | C11 C12 C13                            | 100 (2)     |
| Br7 <sup>2</sup> -Sn2-Br6 <sup>2</sup> | 90.50 (14)  | C14 C13 C12                            | 108 (3)     |

Symmetry transformation used to generate equivalent atoms: <sup>1</sup>1-X,1-Y,+Z; <sup>2</sup>1-X,-Y,+Z

### Calculation of ' $\Delta H$ ', ' $\Delta S$ ' and ' $N$ ' For 1:

According to Boltzmann equation:

$$\Delta S = nR \ln N,$$

Where

$\Delta S$  is entropy change extracted from the  $C_p$  data,

$R$  is the gas constant,

$n$  denotes the number of guest particles per mole, and

$N$  = the number of possible orientations for the disordered system.

The  $\Delta S$ ,  $\Delta H$  and  $N$  values on the heating process of 1 are calculated as follows:

$$\Delta H = 1.156 \text{ J.g}^{-1} \times 770.46 \text{ g.mol}^{-1} = 890.7 \text{ J.mol}^{-1}$$

$$\Delta S = \int_{T_1}^{T_2} \frac{Q}{T} dT \approx \frac{\Delta H}{T_c} = 2.53 \text{ J mol}^{-1} \text{ K}^{-1}$$

The  $N$  value is calculated to be 1.36.
